# Supplementary material for: Synthesis and Characterization of Antibacterial Chitosan Films with Ciprofloxacin in Acidic Conditions
Source: MDPI journal article supplement (doi:10.3390/ijms242015163), 2023-10-13
Supplement: s1 [file s1]

Figure S1. Analysis of chitosan's based on  $^1\text{H}$ - NMR Spectroscopy

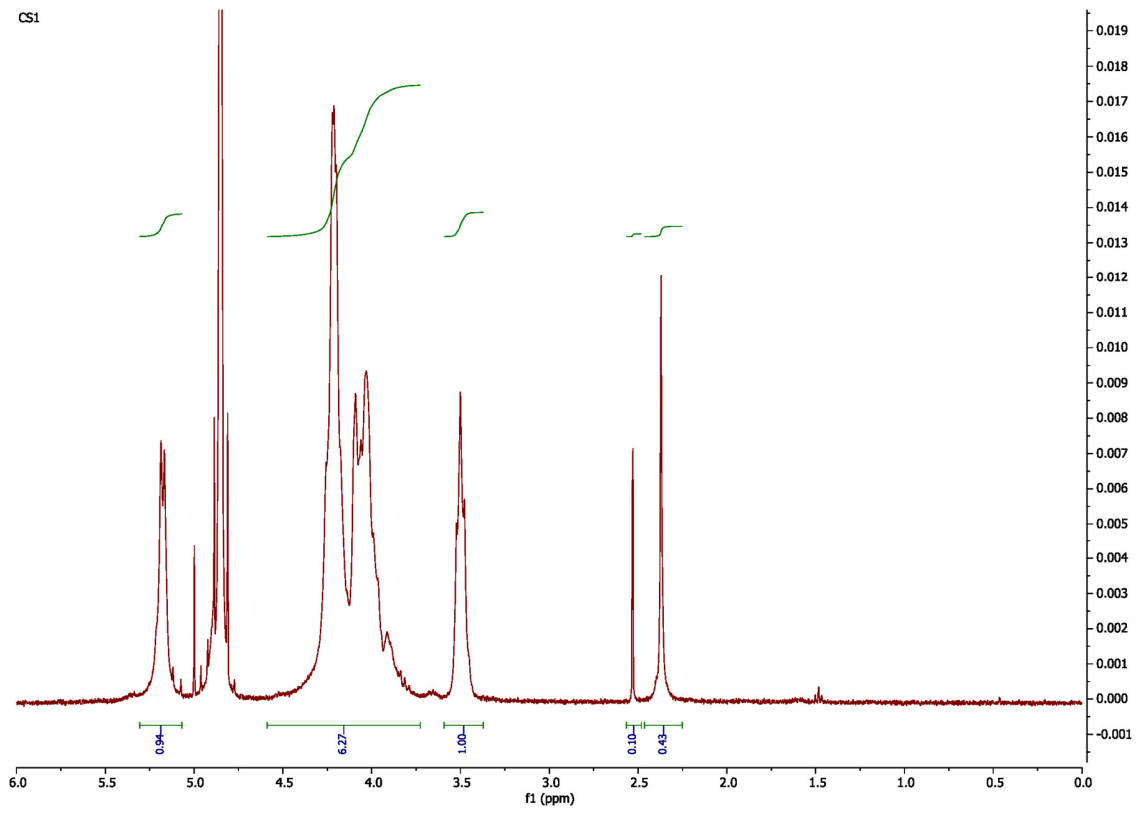

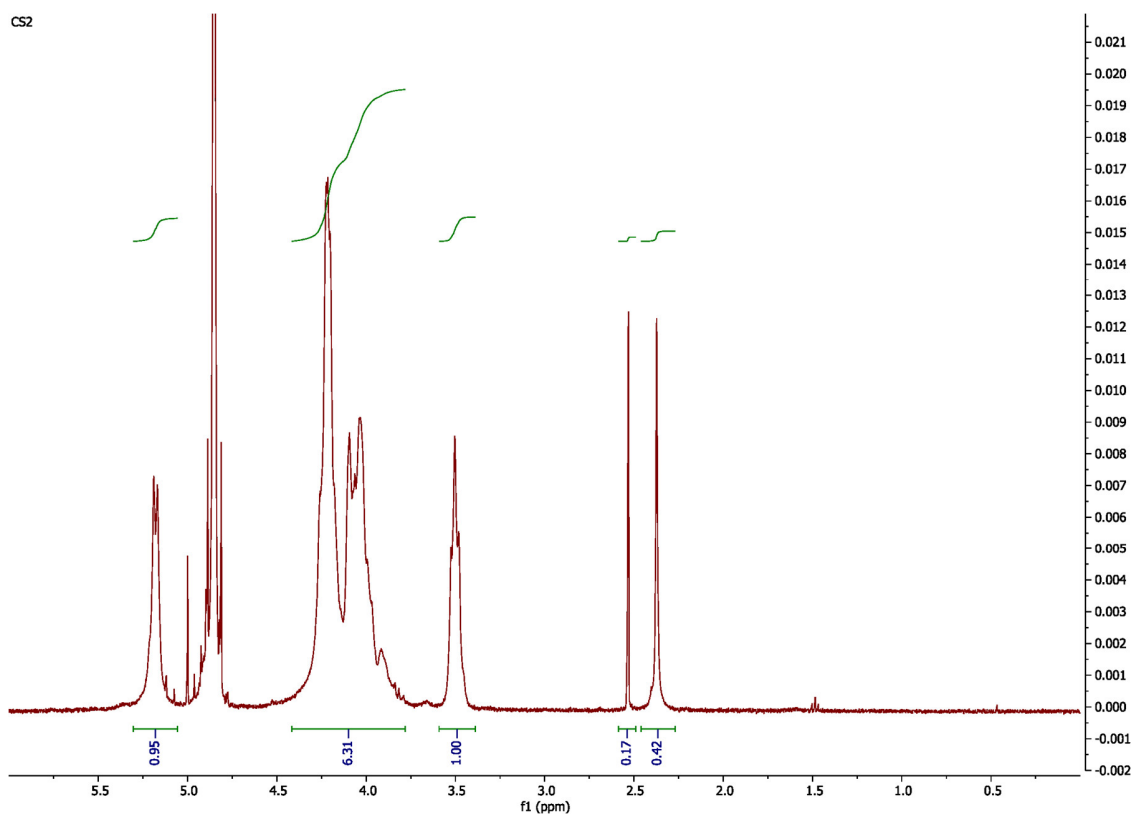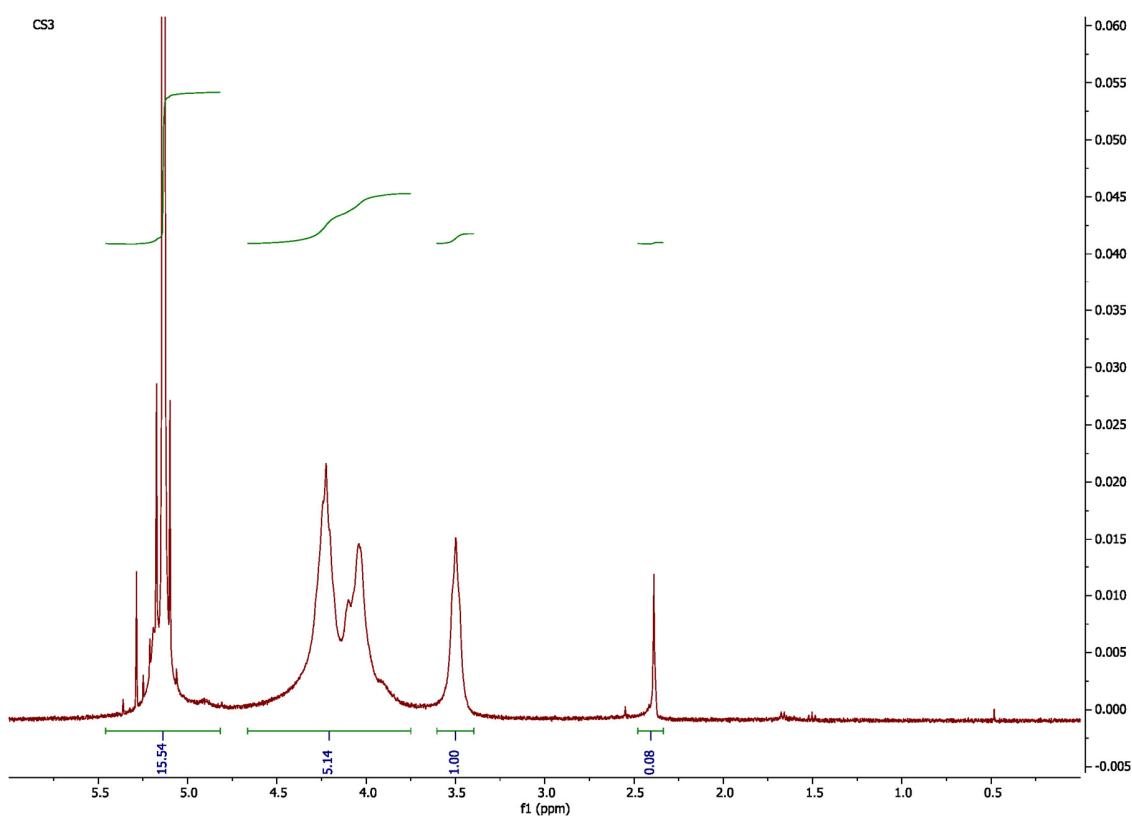

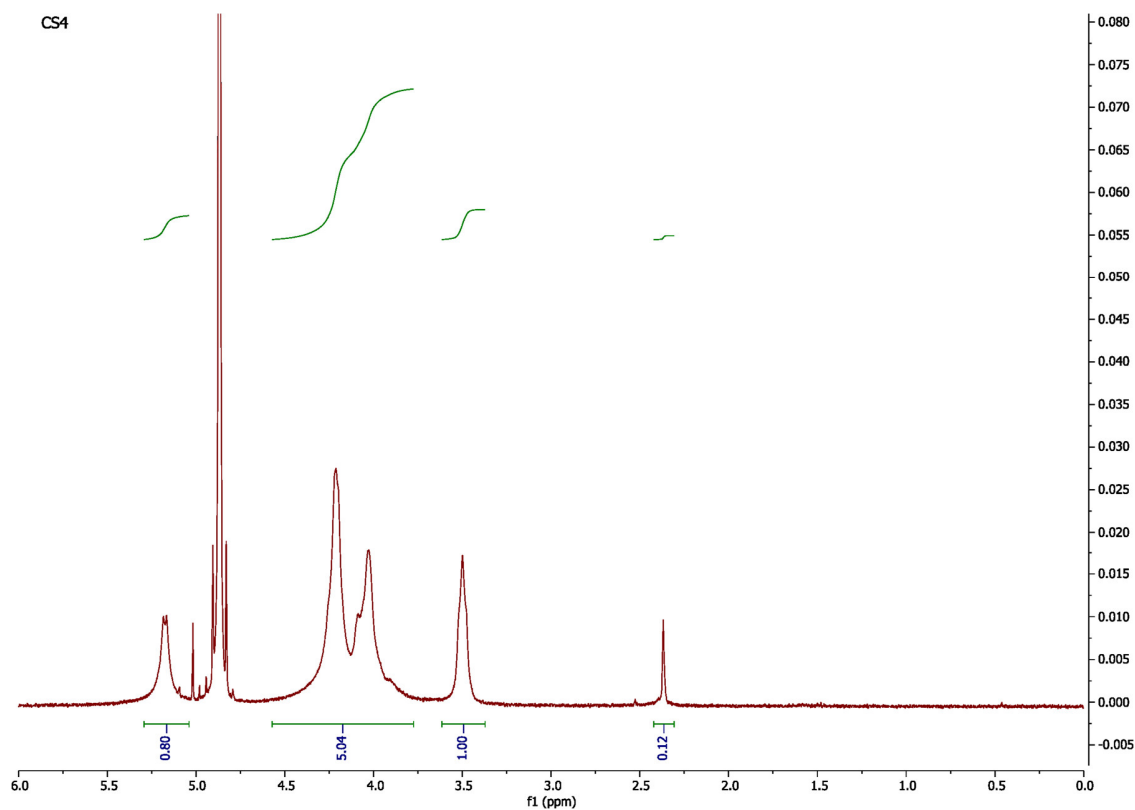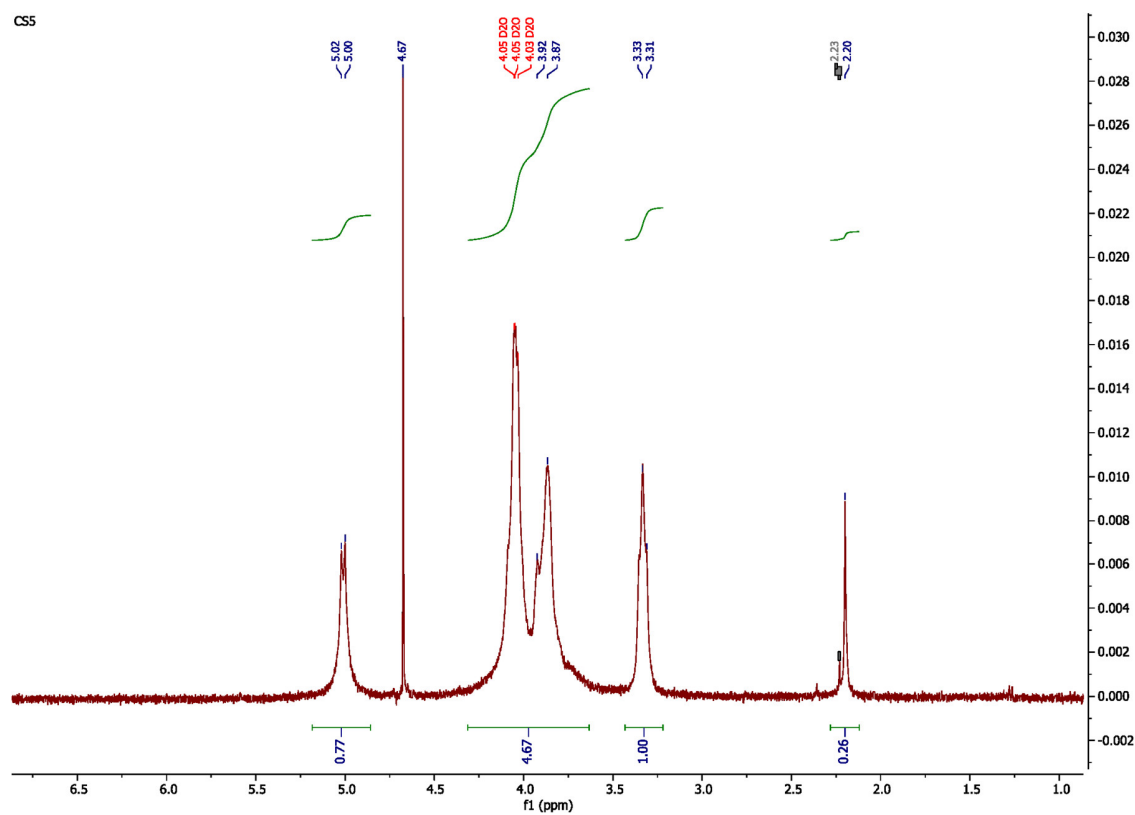

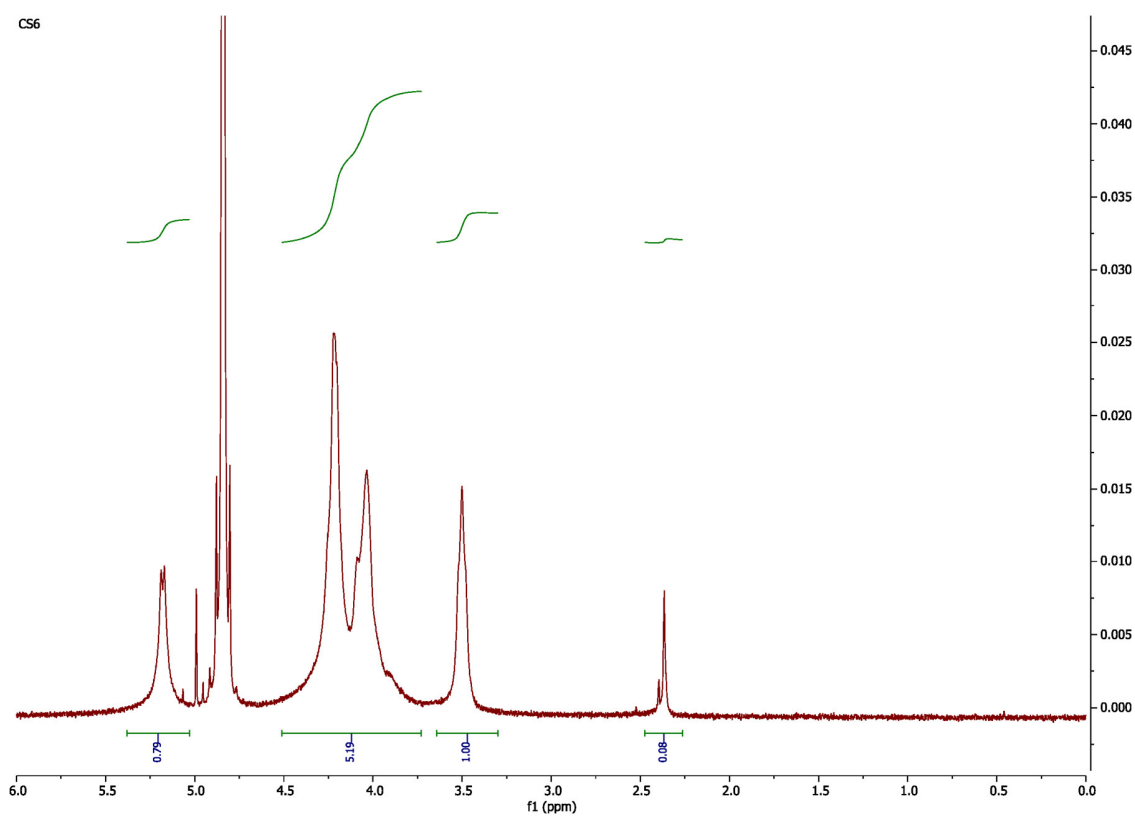

Table S1. Degree of deacetylation of chitosan's calculated from  $^1\text{H}$ - NMR spectra.

| Sample name | DD (%) |
|-------------|--------|
| CS1         | 82.33  |
| CS2         | 80.33  |
| CS3         | 97.3   |
| CS4         | 96     |
| CS5         | 91.33  |
| CS6         | 97.3   |
